# Supplementary material
Source: PubMed Central journal article supplement (PMC3512058)
Supplement: supp_en.2011-2081v1_EN-11-2081_Supplemental_Files.pdf [file supp_en.2011-2081v1_EN-11-2081_Supplemental_Files.pdf]

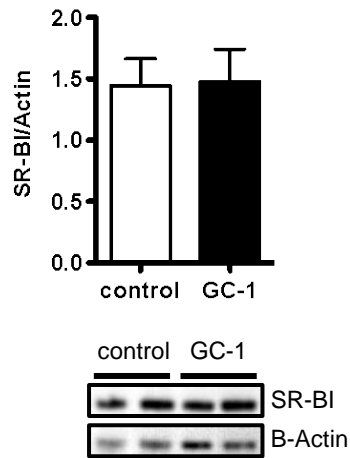

**Supplemental Figure 1.** GC-1 does not induce hepatic SR-BI protein in male LDLR<sup>-/-</sup> mice treated with GC-1 as in **Fig. 1** for 10 days. (N=4 per group)

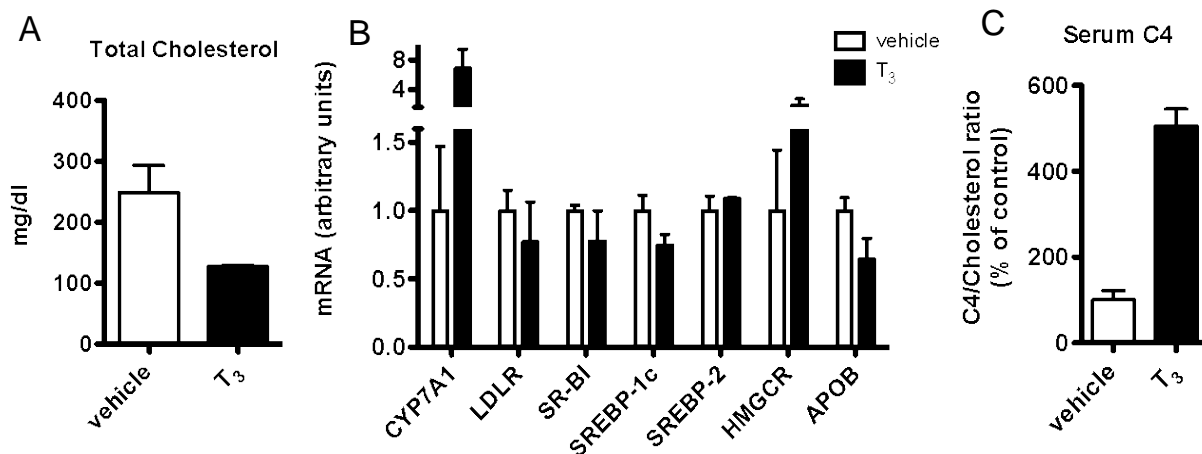

**Supplemental Figure 2.** T<sub>3</sub> reduces serum cholesterol and affects bile acid synthesis in a fashion similar to GC-1. Male C57Bl6 Mice were treated with 0.3 mg/kg-day T<sub>3</sub> administered via i.p. injection for 10 days, in a fashion similar to that shown in Figure 6, which proved to be toxic to this strain, resulting in morbidity or mortality to most treated animals. Serum cholesterol (A), hepatic gene expression (B) and serum C4 levels (C) were measured for the surviving animals, N=2. Statistical analysis was not performed due to the small number of animals.
